# Supplementary material
Source: HighWire-hosted journal article supplement (https://ijgc.bmj.com/highwire/filestream/22112/field_highwire_adjunct_files/0/ijgc-2021-002860supp001_data_supplement.pdf)
Supplement: ijgc-2021-002860supp001_data_supplement.pdf [file ijgc-2021-002860supp001_data_supplement.pdf]

| CTCC      | craniocaudal (mm) | anteroposterior (mm) | laterolateral (mm) |
|-----------|-------------------|----------------------|--------------------|
| 1 case1   | 51                | 44                   | 40                 |
| 2 case2   | 43                | 39                   | 37                 |
| 3 case3   | 24                | 10                   | 20                 |
| 4 case4   | 47                | 32                   | 37                 |
| 5 case5   | 33                | 32                   | 20                 |
| 6 case6   | 45                | 42                   | 41                 |
| 7 case7   | 28                | 24                   | 25                 |
| 8 case8   | 18                | 11                   | 13                 |
| 9 case9   | 34                | 34                   | 34                 |
| 10 case10 | 44                | 43                   | 36                 |
| 11 case11 | 35                | 13                   | 26                 |
| 12 case12 | 46                | 18                   | 23                 |
| 13 case13 | 48                | 34                   | 40                 |
| 14 case14 | 29                | 29                   | 29                 |
| 15 case15 | 38                | 36                   | 27                 |
| 16 case16 | 60                | 49                   | 30                 |
| 17 case17 | 21                | 20                   | 20                 |
| 18 case18 | 72                | 31                   | 12                 |
| 19 case19 | 37                | 26                   | 36                 |
| 20 case20 | 50                | 29                   | 28                 |
| 21 case21 | 42                | 33                   | 41                 |
| 22 case22 | 40                | 31                   | 39                 |
| 23 case23 | 19                | 18                   | 16                 |
| 24 case24 | 38                | 36                   | 25                 |
| 25 case25 | 50                | 40                   | 36                 |
| 26 case26 | 33                | 16                   | 23                 |
| 27 case27 | 33                | 22                   | 28                 |
| 28 case28 | 74                | 48                   | 44                 |
| 29 case29 | 50                | 40                   | 36                 |
| 30 case30 | 40                | 40                   | 36                 |
| 31 case31 | 35                | 31                   | 30                 |
| 32 case32 | 49                | 36                   | 42                 |
| 33 case33 | 33                | 21                   | 29                 |
| 34 case34 | 49                | 26                   | 31                 |
| 35 case35 | 33                | 25                   | 26                 |
| 36 case36 | 38                | 17                   | 36                 |
| 37 case37 | 52                | 37                   | 35                 |
| 38 case38 | 27                | 26                   | 13                 |
| 39 case39 | 36                | 21                   | 33                 |
| 40 case40 | 15                | 7                    | 12                 |
| 41 case41 | 38                | 30                   | 25                 |
| 42 case42 | 21                | 16                   | 15                 |
| 43 case43 | 54                | 49                   | 52                 |
| RTCC      |                   |                      |                    |
| 1 case1   | 47                | 28                   | 29                 |
| 2 case2   | 25                | 20                   | 14                 |
| 3 case3   | 34                | 21                   | 29                 |
| 4 case4   | 65                | 41                   | 41                 |

|           |    |    |    |
|-----------|----|----|----|
| 5 case5   | 34 | 25 | 22 |
| 6 case6   | 50 | 35 | 44 |
| 7 case7   | 30 | 22 | 29 |
| 8 case8   | 44 | 44 | 30 |
| 9 case9   | 40 | 22 | 26 |
| 10 case10 | 30 | 26 | 26 |
| 11 case11 | 30 | 28 | 28 |
| 12 case12 | 40 | 36 | 26 |
| 13 case13 | 45 | 36 | 45 |
| 14 case14 | 21 | 6  | 14 |
| 15 case15 | 34 | 24 | 28 |
| 16 case16 | 10 | 10 | 10 |
| 17 case17 | 12 | 12 | 6  |
| 18 case18 | 15 | 15 | 15 |
| 19 case19 | 21 | 12 | 19 |
| 20 case20 | 15 | 11 | 13 |
| 21 case21 | 22 | 10 | 10 |

| volume (cm3) | Sexual history | Marital history | age | Hysterocele | well differentiated |
|--------------|----------------|-----------------|-----|-------------|---------------------|
| 46.94        | yes            | yes             | 51  | no          | well differentiated |
| 32.45        | yes            | yes             | 55  | no          | well differentiated |
| 2.51         | yes            | yes             | 69  | no          | well differentiated |
| 29.1         | yes            | yes             | 62  | no          |                     |
| 11.05        | yes            | yes             | 61  | no          | well differentiated |
| 40.53        | yes            | yes             | 53  | no          |                     |
| 8.79         | yes            | yes             | 49  | no          |                     |
| 1.35         | yes            | yes             | 51  | no          |                     |
| 20.56        | yes            | yes             | 54  | no          |                     |
| 35.62        | yes            | yes             | 66  | no          |                     |
| 4.42         | yes            | yes             | 38  | no          |                     |
| 9.96         | yes            | yes             | 37  | no          |                     |
| 34.14        | yes            | yes             | 57  | yes         |                     |
| 12.76        | yes            | yes             | 55  | no          |                     |
| 19.32        | yes            | yes             | 39  | no          |                     |
| 46.13        | yes            | yes             | 54  | no          | well differentiated |
| 4.39         | yes            | yes             | 35  | no          |                     |
| 14.01        | yes            | yes             | 67  | yes         |                     |
| 18.11        | yes            | yes             | 50  | no          |                     |
| 21.23        | yes            | yes             | 53  | no          |                     |
| 29.72        | yes            | yes             | 42  | no          |                     |
| 25.29        | yes            | yes             | 63  | no          | well differentiated |
| 2.86         | yes            | yes             | 49  | no          |                     |
| 17.89        | yes            | yes             | 50  | no          |                     |
| 37.66        | yes            | yes             | 67  | yes         | well differentiated |
| 6.35         | yes            | yes             | 52  | no          | well differentiated |
| 10.63        | yes            | yes             | 60  | no          |                     |
| 81.74        | yes            | yes             | 52  | no          |                     |
| 37.66        | yes            | yes             | 51  | no          |                     |
| 30.12        | yes            | yes             | 52  | no          |                     |
| 17.02        | yes            | yes             | 54  | yes         |                     |
| 38.75        | yes            | yes             | 53  | no          |                     |
| 10.51        | yes            | yes             | 46  | no          |                     |
| 20.66        | yes            | yes             | 54  | no          | well differentiated |
| 11.22        | yes            | yes             | 49  | yes         |                     |
| 12.16        | yes            | yes             | 43  | no          |                     |
| 35.22        | yes            | yes             | 55  | yes         |                     |
| 4.77         | yes            | yes             | 32  | no          |                     |
| 13.05        | yes            | yes             | 43  | no          |                     |
| 0.66         | yes            | yes             | 31  | pregnancy   |                     |
| 14.91        | yes            | yes             | 41  | no          | well differentiated |
| 2.64         | yes            | yes             | 40  | no          |                     |
| 71.96        | yes            | yes             | 60  | yes         |                     |
| 19.96        | yes            | yes             | 50  | yes         |                     |
| 3.66         | yes            | yes             | 55  | yes         |                     |
| 10.83        | yes            | yes             | 49  | no          | well differentiated |
| 57.15        | yes            | yes             | 54  | no          |                     |

|       |     |     |    |     |                     |
|-------|-----|-----|----|-----|---------------------|
| 9.78  | yes | yes | 51 | no  |                     |
| 40.27 | yes | yes | 64 | yes |                     |
| 10.01 | yes | yes | 60 | yes | well differentiated |
| 30.38 | yes | yes | 62 | no  | well differentiated |
| 11.97 | No  | No  | 23 | no  |                     |
| 10.61 | yes | yes | 47 | no  |                     |
| 12.3  | yes | yes | 45 | no  |                     |
| 19.56 | yes | yes | 58 | yes |                     |
| 38.13 | yes | yes | 44 | no  |                     |
| 0.92  | yes | yes | 42 | no  |                     |
| 11.95 | yes | yes | 48 | no  |                     |
| 0.52  | yes | yes | 55 | no  |                     |
| 0.45  | yes | yes | 44 | no  |                     |
| 1.77  | yes | yes | 35 | no  |                     |
| 2.5   | yes | yes | 41 | no  |                     |
| 1.12  | yes | yes | 39 | no  | well differentiated |
| 1.15  | yes | yes | 43 | no  |                     |

| Grade                     |                       | Echogenicity |             |           |
|---------------------------|-----------------------|--------------|-------------|-----------|
| moderately differentiated | poorly differentiated | Hypoechoic   | Hyperechoic | Isoechoic |
|                           |                       | Hypoechoic   |             |           |
|                           |                       | Hypoechoic   |             |           |
| moderately differentiated |                       | Hypoechoic   |             |           |
|                           |                       | Hypoechoic   |             |           |
| moderately differentiated |                       | Hypoechoic   |             |           |
| moderately differentiated |                       | Hypoechoic   |             |           |
| moderately differentiated | poorly differentiated | Hypoechoic   |             |           |
| moderately differentiated |                       |              |             | Isoechoic |
| moderately differentiated |                       | Hypoechoic   |             |           |
| moderately differentiated |                       | Hypoechoic   |             |           |
| moderately differentiated | poorly differentiated | Hypoechoic   |             |           |
|                           |                       | Hypoechoic   |             |           |
| moderately differentiated | poorly differentiated | Hypoechoic   |             |           |
| moderately differentiated |                       |              | Hyperechoic |           |
| moderately differentiated |                       | Hypoechoic   |             |           |
| moderately differentiated |                       |              |             | Isoechoic |
| moderately differentiated |                       | Hypoechoic   |             |           |
| moderately differentiated |                       | Hypoechoic   |             |           |
| moderately differentiated |                       |              |             | Isoechoic |
|                           | poorly differentiated | Hypoechoic   |             |           |
|                           |                       | Hypoechoic   |             |           |
| moderately differentiated |                       | Hypoechoic   |             |           |
| moderately differentiated | poorly differentiated | Hypoechoic   |             |           |
| moderately differentiated |                       |              | Hyperechoic |           |
|                           | poorly differentiated |              |             |           |
|                           | poorly differentiated |              |             |           |
| moderately differentiated |                       | Hypoechoic   |             |           |
| moderately differentiated |                       | Hypoechoic   |             |           |
| moderately differentiated |                       | Hypoechoic   |             |           |
| moderately differentiated |                       | Hypoechoic   |             |           |
| moderately differentiated |                       | Hypoechoic   |             |           |
| moderately differentiated |                       | Hypoechoic   |             |           |
| moderately differentiated |                       | Hypoechoic   |             |           |
| moderately differentiated |                       | Hypoechoic   |             |           |
| moderately differentiated |                       | Hypoechoic   |             |           |
| moderately differentiated |                       | Hypoechoic   |             |           |
| moderately differentiated |                       | Hypoechoic   |             |           |
| moderately differentiated |                       | Hypoechoic   |             |           |
| moderately differentiated |                       | Hypoechoic   |             |           |
| moderately differentiated |                       | Hypoechoic   |             |           |
| moderately differentiated |                       | Hypoechoic   |             |           |
| moderately differentiated |                       | Hypoechoic   |             |           |
| moderately differentiated | poorly differentiated | Hypoechoic   |             |           |
|                           |                       | Hypoechoic   |             |           |
|                           |                       | Hypoechoic   |             |           |

|                           |                       |            |
|---------------------------|-----------------------|------------|
| moderately differentiated |                       | Isoechoic  |
| moderately differentiated |                       | Isoechoic  |
|                           |                       | Isoechoic  |
|                           | poorly differentiated | Hypoechoic |
|                           | poorly differentiated | Isoechoic  |
|                           | poorly differentiated | Isoechoic  |
|                           | poorly differentiated | Hypoechoic |
|                           | poorly differentiated |            |
| moderately differentiated |                       | Isoechoic  |

|              | Growth pattern |            | HPV infection |          | 宫颈原位癌 | T1a(宫颈癌) |
|--------------|----------------|------------|---------------|----------|-------|----------|
| Mixed echoic | Exophytic      | Endophytic | positive      | negative | Tis   | T1a1     |
|              | Exophytic      |            |               | negative |       |          |
|              | Exophytic      |            | positive      |          |       |          |
|              | Exophytic      |            | positive      |          |       |          |
|              | Exophytic      |            | positive      |          |       |          |
|              | Exophytic      |            | positive      |          |       |          |
| Mixed echoic | Exophytic      |            |               | negative |       |          |
|              | Exophytic      |            | positive      |          |       |          |
|              | Exophytic      |            |               | negative |       |          |
|              | Exophytic      |            | positive      |          |       |          |
|              |                | Endophytic | positive      |          |       |          |
|              | Exophytic      |            |               | negative |       |          |
|              | Exophytic      |            | positive      |          |       |          |
|              |                | Endophytic | positive      |          |       |          |
|              |                | Endophytic | positive      |          |       |          |
|              | Exophytic      |            | positive      |          |       |          |
|              | Exophytic      |            | positive      |          |       |          |
|              | Exophytic      |            | positive      |          |       |          |
|              |                | Endophytic | positive      |          |       |          |
|              |                | Endophytic | positive      |          |       |          |
|              | Exophytic      |            | positive      |          |       |          |
|              | Exophytic      |            |               | negative |       |          |
|              | Exophytic      |            | positive      |          |       |          |
|              | Exophytic      |            | positive      |          |       |          |
|              |                | Endophytic | positive      |          |       |          |
|              |                | Endophytic | positive      |          |       |          |
| Mixed echoic | Exophytic      |            |               | negative |       |          |
|              | Exophytic      |            | positive      |          |       |          |
|              | Exophytic      |            | positive      |          |       |          |
|              |                | Endophytic | positive      |          |       |          |
| Mixed echoic |                | Endophytic | positive      |          |       |          |
| Mixed echoic |                | Endophytic | positive      |          |       |          |
|              |                | Endophytic | positive      |          |       |          |
|              |                | Endophytic | positive      |          |       |          |
|              |                | Endophytic | positive      |          |       |          |
| Mixed echoic | Exophytic      |            | positive      |          |       |          |
|              | Exophytic      |            | positive      |          |       |          |
|              | Exophytic      |            | positive      |          |       |          |
|              | Exophytic      |            | positive      |          |       |          |
|              | Exophytic      |            | positive      |          |       |          |
|              | Endophytic     | positive   |               |          |       |          |
| Mixed echoic | Exophytic      |            | positive      |          |       |          |
|              | Exophytic      |            | positive      |          |       |          |
|              | Exophytic      |            | positive      |          |       |          |
|              |                | Endophytic |               | negative |       |          |
| Mixed echoic |                | Endophytic |               | negative |       |          |
|              |                | Endophytic |               | negative |       |          |
|              |                | Endophytic |               | negative |       |          |
|              | Exophytic      |            |               | negative |       |          |

|              |            |          |
|--------------|------------|----------|
|              | Exophytic  | positive |
|              | Endophytic | positive |
| Mixed echoic | Endophytic | negative |
|              | Endophytic | negative |
|              | Endophytic | negative |
|              | Exophytic  | positive |
|              | Exophytic  | positive |
|              | Exophytic  | positive |
| Mixed echoic | Endophytic | positive |
|              | Endophytic | positive |
|              | Exophytic  | negative |
|              | Exophytic  | positive |
|              | Endophytic | positive |
|              | Endophytic | negative |
|              | Endophytic | negative |
|              | Endophytic | positive |
|              | Endophytic | negative |



|        |               | TNM      |      |          |
|--------|---------------|----------|------|----------|
| 局限于子宫) | T1b(宫颈癌局限于子宫) | T2a无宫旁浸润 |      | T2b有宫旁浸润 |
| T1a2   | T1b1          | T1b2     | T2a1 | T2a2     |
|        |               | T1b2     |      |          |
|        |               |          | T2a1 | T2a2     |
|        |               |          | T2a1 | T2a2     |
|        |               |          | T2a1 | T2a2     |
|        | T1b1          |          |      |          |
|        | T1b1          |          |      |          |
|        | T1b1          |          |      |          |
|        | T1b1          |          |      | T2a2     |
|        | T1b1          |          |      |          |
|        | T1b1          | T1b2     |      |          |
|        | T1b1          | T1b2     |      |          |
|        | T1b1          |          |      | T2a2     |
|        |               |          | T2a1 | T2b      |
|        |               |          | T2a2 |          |
|        | T1b1          |          |      |          |
|        | T1b1          |          |      |          |
|        |               | T1b2     |      | T2a2     |
|        |               |          |      | T2a2     |
|        |               |          |      | T2a2     |
|        | T1b1          |          |      | T2b      |
|        | T1b1          |          |      | T2a2     |
|        |               |          |      | T2a2     |
|        | T1b1          |          |      |          |
|        | T1b1          |          |      |          |
|        | T1b1          |          |      |          |
|        |               |          |      | T2a2     |
|        | T1b1          |          |      |          |
|        | T1b1          |          |      |          |
|        |               |          |      | T2a2     |

T1b1  
T1b2  
T2a1  
T1b2  
T2b  
T2a1  
T1b2  
T1b1  
T1b1  
T1b1  
T1b1  
T1b1  
T1b1  
T1b1  
T1b1

T3a (侵及下1/3阴道, 未到达盆壁) T3b (到达盆壁或引起肾积水或无功能肾) T4 Tis T1a1  
T3a T3b T4

T4

T4

T4  
T4

T3a

T4

Tis

T4

T4

T4

| pathology |                |              |      |              |       |            |       |          |
|-----------|----------------|--------------|------|--------------|-------|------------|-------|----------|
| T1a2      | T1b1           | T1b2<br>T1b2 | T2a1 | T2a2         | T2b   | T3a        | T3b   | T4       |
|           |                |              |      |              |       | T3a        |       |          |
|           |                |              | T2a1 |              |       |            |       |          |
|           |                |              |      | T2a2         |       |            |       |          |
|           |                |              | T2a1 |              |       |            |       |          |
|           |                |              |      | T2a2N1       |       |            |       |          |
|           |                |              | T2a1 |              |       |            |       |          |
|           | T1b1<br>T1b1N1 |              |      |              |       |            |       | T4       |
|           |                |              |      | T2a2<br>T2a2 |       |            |       | T4       |
|           | T1b1<br>T1b1   |              |      |              |       |            |       |          |
|           | T1b1           | T1b2         |      |              |       |            |       |          |
|           | T1b1           | T1b2         |      |              |       |            |       |          |
|           | T1b1           |              |      | T2a2         | T2bN1 |            |       | T4<br>T4 |
|           |                |              |      |              |       |            | T3bN1 |          |
|           |                |              |      | T2a2         |       |            |       |          |
|           | T1b1<br>T1b1   |              |      | T2a2         |       |            |       |          |
|           |                | T1b2         |      | T2a2         |       |            |       |          |
|           |                |              |      | T2a2         |       |            | T3bN1 |          |
|           |                |              |      |              |       | T3aN1      |       |          |
|           | T1b1           |              |      | T2a2         |       |            |       |          |
|           | T1b1           |              |      |              |       | T3a<br>T3a |       |          |
|           | T1b1N1         |              |      |              |       |            |       |          |
|           |                |              | T2a1 |              |       |            |       |          |
|           | T1b1           |              |      |              |       |            |       |          |
|           | T1b1           |              |      |              |       |            |       | T4       |
|           |                |              |      | T2a2N1       |       |            |       |          |
|           | T1b1<br>T1b1   |              |      |              |       |            |       |          |
|           |                |              |      | T2a2         |       |            |       |          |

T1b1  
T1b2N1  
T2a1  
T1b2  
T2b  
T2a1N1  
T2a1  
T1b2  
T4  
T1b1  
T1b1  
T1b1  
T1b1  
T1b1  
T1b1  
T1b1  
T1b1  
T1b1
